# Supplementary material
Source: PubMed Central journal article supplement (PMC3649634)
Supplement: supp_kws356_kws356_Web_Tables.pdf [file supp_kws356_kws356_Web_Tables.pdf]

Web Table 1. Multivariable-adjusted<sup>a</sup> association of serum *trans*-fatty acids (TFA) with prostate cancer risk in CARET, 1985-2003

| <i>Trans</i> -fatty acids                   | Quartile 1 |      | Quartile 2 |      |            | Quartile 3 |      |            | Quartile 4 |      |            | <i>P</i> -trend |
|---------------------------------------------|------------|------|------------|------|------------|------------|------|------------|------------|------|------------|-----------------|
|                                             | N          | OR   | N          | OR   | 95% CI     | N          | OR   | 95% CI     | N          | OR   | 95% CI     |                 |
| Non-aggressive prostate cancer <sup>b</sup> |            |      |            |      |            |            |      |            |            |      |            |                 |
| TFA C16:1                                   | 85/350     | 1.00 | 87/349     | 1.05 | 0.74, 1.47 | 91/349     | 1.17 | 0.83, 1.66 | 105/350    | 1.37 | 0.96, 1.94 | 0.06            |
| TFA C18:1                                   | 94/349     | 1.00 | 79/350     | 0.87 | 0.62, 1.22 | 108/349    | 1.18 | 0.85, 1.64 | 87/350     | 0.99 | 0.70, 1.41 | 0.61            |
| TFA C18:2                                   | 89/350     | 1.00 | 90/349     | 1.01 | 0.72, 1.41 | 92/350     | 1.01 | 0.73, 1.41 | 97/349     | 1.09 | 0.78, 1.51 | 0.64            |
| Aggressive prostate cancer <sup>c</sup>     |            |      |            |      |            |            |      |            |            |      |            |                 |
| TFA C16:1                                   | 75/350     | 1.00 | 63/349     | 0.87 | 0.60, 1.26 | 66/349     | 1.01 | 0.68, 1.48 | 69/350     | 1.05 | 0.71, 1.55 | 0.65            |
| TFA C18:1                                   | 70/349     | 1.00 | 66/350     | 0.98 | 0.67, 1.43 | 68/349     | 1.06 | 0.73, 1.56 | 69/350     | 1.14 | 0.77, 1.69 | 0.45            |
| TFA C18:2                                   | 69/350     | 1.00 | 51/349     | 0.71 | 0.48, 1.06 | 83/350     | 1.18 | 0.82, 1.68 | 70/349     | 0.99 | 0.68, 1.44 | 0.44            |

Abbreviations: BMI, body mass index; CARET, Carotene and Retinol Efficacy Trial; CI: confidence interval; N: number of cases/number of controls; OR: odds ratio; TFA, *trans*-fatty acid.

<sup>a</sup> Multivariate adjusting age at enrollment (continuous), race (white, black, others), CARET randomization assignment (retinol plus  $\beta$ -carotene, placebo), family history of prostate cancer in first-relatives (yes, no), alcohol consumption (non-drinker, below median, at or above median, unknown), smoking status (current, former/never), smoking pack-year (<40, 40, <60,  $\geq$ 60), and BMI (continuous).

<sup>b</sup> Defined as stage 0–II tumors and Gleason score <7.

<sup>c</sup> Defined as stage III/IV tumors or Gleason score  $\geq$ 7.

Web Table 2. Joint association<sup>a</sup> of serum n-3 and n-6 polyunsaturated fatty acids (PUFAs) and myeloperoxidase gene (*MPO* G-463A) polymorphism with non-aggressive prostate cancer<sup>b</sup> in CARET, 1985-2003

| Fatty acids                      | <i>MPO</i> genotype | Quartile 1 |      |            | Quartile 2 |      |            | Quartile 3 |      |            | Quartile 4 |      |            | <i>P</i> -trend | <i>P</i> -inter-action |
|----------------------------------|---------------------|------------|------|------------|------------|------|------------|------------|------|------------|------------|------|------------|-----------------|------------------------|
|                                  |                     | N          | OR   | 95% CI)    | N          | OR   | 95% CI     | N          | OR   | 95% CI     | N          | OR   | 95% CI     |                 |                        |
| <b>n-3 PUFAs</b>                 |                     |            |      |            |            |      |            |            |      |            |            |      |            |                 |                        |
| $\alpha$ -Linolenic acid         | GG                  | 42/204     | 1.00 | Referent   | 40/210     | 0.89 | 0.55, 1.43 | 43/189     | 1.10 | 0.68, 1.77 | 28/217     | 0.63 | 0.37, 1.07 | 0.20            | 0.15                   |
|                                  | GA/AA               | 20/138     | 0.73 | 0.41, 1.30 | 35/132     | 1.33 | 0.80, 2.20 | 24/156     | 0.74 | 0.43, 1.29 | 30/123     | 1.18 | 0.70, 2.01 | 0.38            |                        |
| Eicosatrienoic acid              | GG                  | 38/202     | 1.00 | Referent   | 40/209     | 1.07 | 0.65, 1.74 | 41/197     | 1.14 | 0.70, 1.86 | 34/212     | 0.88 | 0.53, 1.46 | 0.72            | 0.15                   |
|                                  | GA/AA               | 22/144     | 0.84 | 0.47, 1.49 | 27/130     | 1.16 | 0.77, 2.00 | 26/145     | 1.01 | 0.58, 1.75 | 33/130     | 1.44 | 0.85, 2.42 | 0.10            |                        |
| Eicosapentaenoic acid (EPA)      | GG                  | 32/216     | 1.00 | Referent   | 40/203     | 1.29 | 0.78, 2.14 | 41/197     | 1.30 | 0.78, 2.17 | 40/204     | 1.20 | 0.72, 2.01 | 0.45            | 0.82                   |
|                                  | GA/AA               | 22/127     | 1.15 | 0.64, 2.08 | 28/144     | 1.31 | 0.75, 2.27 | 35/146     | 1.55 | 0.91, 2.64 | 24/132     | 1.17 | 0.65, 2.10 | 0.93            |                        |
| Docosapentaenoic acid (DPA)      | GG                  | 40/227     | 1.00 | Referent   | 38/191     | 1.10 | 0.67, 1.78 | 37/206     | 1.00 | 0.61, 1.63 | 38/196     | 1.04 | 0.64, 1.69 | 0.94            | 0.57                   |
|                                  | GA/AA               | 27/118     | 1.32 | 0.77, 2.28 | 29/150     | 1.11 | 0.66, 1.88 | 25/137     | 1.02 | 0.59, 1.76 | 28/144     | 1.07 | 0.63, 1.83 | 0.47            |                        |
| Docosahexaenoic acid (DHA)       | GG                  | 38/227     | 1.00 | Referent   | 44/196     | 1.39 | 0.86, 2.24 | 39/206     | 1.17 | 0.71, 1.92 | 32/191     | 1.05 | 0.62, 1.78 | 0.85            | 0.55                   |
|                                  | GA/AA               | 27/116     | 1.44 | 0.83, 2.49 | 28/146     | 1.21 | 0.71, 2.06 | 28/139     | 1.27 | 0.74, 2.18 | 26/148     | 1.12 | 0.64, 1.95 | 0.66            |                        |
| EPA + DHA                        | GG                  | 34/230     | 1.00 | Referent   | 45/199     | 1.57 | 0.96, 2.55 | 42/200     | 1.46 | 0.89, 2.40 | 32/191     | 1.17 | 0.68, 1.99 | 0.73            | 0.83                   |
|                                  | GA/AA               | 22/115     | 1.33 | 0.74, 2.38 | 30/144     | 1.48 | 0.86, 2.53 | 27/143     | 1.34 | 0.77, 2.33 | 30/147     | 1.45 | 0.84, 2.52 | 0.73            |                        |
| Total n-3                        | GG                  | 38/229     | 1.00 | Referent   | 41/202     | 1.22 | 0.75, 1.99 | 45/201     | 1.37 | 0.85, 2.21 | 29/188     | 0.94 | 0.55, 1.60 | 0.93            | 0.54                   |
|                                  | GA/AA               | 31/118     | 1.63 | 0.96, 2.76 | 22/138     | 1.00 | 0.56, 1.76 | 26/142     | 1.12 | 0.65, 1.94 | 30/151     | 1.24 | 0.72, 2.13 | 0.58            |                        |
| <b>n-6 PUFAs</b>                 |                     |            |      |            |            |      |            |            |      |            |            |      |            |                 |                        |
| Linoleic acid                    | GG                  | 40/202     | 1.00 | Referent   | 42/193     | 1.11 | 0.68, 1.79 | 29/197     | 0.74 | 0.44, 1.25 | 42/228     | 0.93 | 0.57, 1.51 | 0.49            | 0.76                   |
|                                  | GA/AA               | 33/139     | 1.27 | 0.76, 2.12 | 23/148     | 0.80 | 0.46, 1.39 | 27/146     | 0.93 | 0.54, 1.60 | 26/116     | 1.18 | 0.68, 2.06 | 0.84            |                        |
| $\gamma$ -Linolenic acid         | GG                  | 42/221     | 1.00 | Referent   | 38/191     | 1.00 | 0.62, 1.63 | 35/196     | 0.84 | 0.51, 1.38 | 38/211     | 0.87 | 0.53, 1.42 | 0.51            | 0.61                   |
|                                  | GA/AA               | 24/121     | 1.05 | 0.61, 1.83 | 28/151     | 0.96 | 0.57, 1.63 | 29/147     | 0.97 | 0.57, 1.65 | 28/130     | 1.06 | 0.62, 1.81 | 0.91            |                        |
| Eicosadienoic acid               | GG                  | 42/209     | 1.00 | Referent   | 35/200     | 0.89 | 0.54, 1.45 | 31/194     | 0.79 | 0.48, 1.32 | 45/217     | 1.07 | 0.67, 1.71 | 0.94            | 0.10                   |
|                                  | GA/AA               | 37/134     | 1.44 | 0.88, 2.37 | 29/138     | 1.08 | 0.64, 1.83 | 21/151     | 0.71 | 0.40, 1.25 | 22/126     | 0.91 | 0.52, 1.62 | 0.06            |                        |
| Dihomo- $\gamma$ -linolenic acid | GG                  | 45/213     | 1.00 | Referent   | 43/200     | 1.01 | 0.63, 1.61 | 39/207     | 0.89 | 0.55, 1.44 | 26/200     | 0.62 | 0.36, 1.06 | 0.08            | 0.90                   |
|                                  | GA/AA               | 28/131     | 1.01 | 0.60, 1.71 | 33/140     | 1.15 | 0.69, 1.90 | 28/132     | 1.06 | 0.62, 1.80 | 20/146     | 0.66 | 0.37, 1.18 | 0.24            |                        |

|                       |       |        |      |            |        |      |            |        |      |            |        |      |            |      |      |
|-----------------------|-------|--------|------|------------|--------|------|------------|--------|------|------------|--------|------|------------|------|------|
| Arachidonic acid      | GG    | 44/207 | 1.00 | Referent   | 32/220 | 0.71 | 0.43, 1.16 | 35/204 | 0.85 | 0.52, 1.39 | 42/189 | 1.09 | 0.68, 1.76 | 0.72 | 0.34 |
|                       | GA/AA | 24/134 | 0.88 | 0.51, 1.52 | 22/124 | 0.85 | 0.48, 1.49 | 22/139 | 0.78 | 0.44, 1.36 | 41/152 | 1.45 | 0.88, 2.37 | 0.09 |      |
| Docosadienoic acid    | GG    | 38/202 | 1.00 | Referent   | 45/207 | 1.19 | 0.74, 1.92 | 39/207 | 1.02 | 0.62, 1.67 | 31/204 | 0.84 | 0.50, 1.41 | 0.45 | 0.13 |
|                       | GA/AA | 20/137 | 0.80 | 0.45, 1.44 | 34/135 | 1.40 | 0.84, 2.35 | 19/142 | 0.75 | 0.41, 1.36 | 36/135 | 1.49 | 0.89, 2.48 | 0.19 |      |
| Docosatetraenoic acid | GG    | 37/208 | 1.00 | Referent   | 37/197 | 1.05 | 0.64, 1.74 | 34/203 | 0.93 | 0.56, 1.54 | 45/212 | 1.21 | 0.74, 1.95 | 0.51 | 0.21 |
|                       | GA/AA | 28/133 | 1.22 | 0.71, 2.10 | 34/142 | 1.37 | 0.82, 2.30 | 26/142 | 1.02 | 0.59, 1.78 | 21/132 | 0.93 | 0.51, 1.68 | 0.27 |      |
| Total n-6             | GG    | 40/201 | 1.00 | Referent   | 41/206 | 1.01 | 0.62, 1.64 | 26/198 | 0.66 | 0.39, 1.13 | 46/215 | 1.10 | 0.68, 1.76 | 0.94 | 0.74 |
|                       | GA/AA | 28/138 | 1.04 | 0.61, 1.78 | 26/138 | 0.97 | 0.56, 1.67 | 26/145 | 0.93 | 0.54, 1.60 | 29/128 | 1.20 | 0.70, 2.05 | 0.65 |      |

Abbreviations: BMI, body mass index; CARET, Carotene and Retinol Efficacy Trial; CI: confidence interval; DHA, docosahexaenoic acid; DPA, docosapentaenoic acid; EPA, eicosapentaenoic acid; *MPO*, myeloperoxidase gene; N: number of cases/number of controls; OR: odds ratio; PUFAs, polyunsaturated fatty acids.

<sup>a</sup> Multivariate adjusting age at enrollment (continuous), race (white, black, others), CARET randomization assignment (retinol plus  $\beta$ -carotene, placebo), family history of prostate cancer in first-relatives (yes, no), alcohol consumption (non-drinker, below median, at or above median, unknown), smoking status (current, former/never), smoking pack-year (<40, 40, <60,  $\geq$ 60), and BMI (continuous).

<sup>b</sup> Defined as stage 0–II tumors and Gleason score <7.

Web Table 3. Joint association<sup>a</sup> of serum *trans*-fatty acids (TFA) and myeloperoxidase gene (*MPO* G-463A) polymorphism with prostate cancer in CARET, 1985-2003

| <i>Trans</i> -fatty acids                   | <i>MPO</i> genotype | Quartile 1 |      |            | Quartile 2 |      |            | Quartile 3 |      |            | Quartile 4 |      |            | <i>P</i> -trend | <i>P</i> -interaction |
|---------------------------------------------|---------------------|------------|------|------------|------------|------|------------|------------|------|------------|------------|------|------------|-----------------|-----------------------|
|                                             |                     | N          | OR   | 95% CI     |                 |                       |
| Non-aggressive prostate cancer <sup>b</sup> |                     |            |      |            |            |      |            |            |      |            |            |      |            |                 |                       |
| TFA C16:1                                   | GG                  | 36/209     | 1.00 | Referent   | 40/218     | 1.11 | 0.68, 1.83 | 33/192     | 1.10 | 0.65, 1.83 | 44/201     | 1.39 | 0.83, 2.31 | 0.24            | 0.81                  |
|                                             | GA/AA               | 26/134     | 1.15 | 0.66, 2.01 | 24/123     | 1.19 | 0.67, 2.11 | 28/150     | 1.19 | 0.69, 2.08 | 31/142     | 1.44 | 0.83, 2.49 | 0.48            |                       |
| TFA C18:1                                   | GG                  | 33/212     | 1.00 | Referent   | 36/187     | 1.31 | 0.78, 2.20 | 44/211     | 1.42 | 0.85, 2.35 | 40/210     | 1.36 | 0.81, 2.30 | 0.28            | 0.71                  |
|                                             | GA/AA               | 28/129     | 1.44 | 0.83, 2.50 | 19/152     | 0.88 | 0.48, 1.61 | 38/133     | 1.96 | 1.15, 3.31 | 24/135     | 1.29 | 0.71, 2.32 | 0.55            |                       |
| TFA C18:2                                   | GG                  | 31/200     | 1.00 | Referent   | 29/208     | 0.90 | 0.52, 1.56 | 41/200     | 1.28 | 0.77, 2.13 | 52/212     | 1.60 | 0.98, 2.62 | 0.020           | 0.08                  |
|                                             | GA/AA               | 29/140     | 1.37 | 0.79, 2.39 | 25/133     | 1.21 | 0.68, 2.15 | 33/144     | 1.50 | 0.88, 2.58 | 22/132     | 1.11 | 0.61, 2.01 | 0.66            |                       |
| Aggressive prostate cancer <sup>c</sup>     |                     |            |      |            |            |      |            |            |      |            |            |      |            |                 |                       |
| TFA C16:1                                   | GG                  | 31/209     | 1.00 | Referent   | 33/218     | 1.07 | 0.63, 1.83 | 34/192     | 1.42 | 0.82, 2.45 | 30/201     | 1.24 | 0.70, 2.19 | 0.29            | 0.82                  |
|                                             | GA/AA               | 21/134     | 1.09 | 0.59, 2.00 | 16/123     | 0.98 | 0.51, 1.88 | 18/150     | 1.00 | 0.53, 1.89 | 23/142     | 1.32 | 0.72, 2.41 | 0.47            |                       |
| TFA C18:1                                   | GG                  | 29/212     | 1.00 | Referent   | 35/187     | 1.38 | 0.80, 2.36 | 31/211     | 1.20 | 0.69, 2.10 | 33/210     | 1.34 | 0.77, 2.34 | 0.49            | 0.35                  |
|                                             | GA/AA               | 23/129     | 1.34 | 0.74, 2.44 | 16/152     | 0.85 | 0.44, 1.64 | 26/133     | 1.55 | 0.86, 2.78 | 13/135     | 0.86 | 0.42, 1.74 | 0.68            |                       |
| TFA C18:2                                   | GG                  | 29/200     | 1.00 | Referent   | 23/208     | 0.77 | 0.43, 1.38 | 41/200     | 1.45 | 0.86, 2.44 | 35/212     | 1.14 | 0.66, 1.95 | 0.21            | 0.32                  |
|                                             | GA/AA               | 24/140     | 1.31 | 0.73, 2.37 | 11/133     | 0.58 | 0.28, 1.21 | 26/144     | 1.25 | 0.70, 2.23 | 17/132     | 0.94 | 0.49, 1.79 | 0.68            |                       |

Abbreviations: BMI, body mass index; CARET, Carotene and Retinol Efficacy Trial; CI: confidence interval; *MPO*, myeloperoxidase gene; N: number of cases/number of controls; OR: odds ratio; TFA, *trans*-fatty acid.

<sup>a</sup> Multivariate adjusting age at enrollment (continuous), race (white, black, others), CARET randomization assignment (retinol plus  $\beta$ -carotene, placebo), family history of prostate cancer in first-relatives (yes, no), alcohol consumption (non-drinker, below median, at or above median, unknown), smoking status (current, former/never), smoking pack-year (<40, 40, <60,  $\geq$ 60), and BMI (continuous).

<sup>b</sup> Defined as stage 0–II tumors and Gleason score <7.

<sup>c</sup> Defined as stage III/IV tumors or Gleason score  $\geq$ 7.

Web Table 4. Joint association<sup>a</sup> of selected serum n-3 and n-6 polyunsaturated fatty acids (PUFAs) and myeloperoxidase gene (*MPO* G-463A) polymorphism with prostate cancer by different definitions of the cases (advanced stage, high-grade, and lethal prostate cancer) in CARET, 1985-2003

| Fatty acids                                                  | <i>MPO</i> genotype | Quartile 1 |      |             | Quartile 2 |      |            | Quartile 3 |      |            | Quartile 4 |      |            | <i>P</i> -trend | <i>P</i> -inter-action |
|--------------------------------------------------------------|---------------------|------------|------|-------------|------------|------|------------|------------|------|------------|------------|------|------------|-----------------|------------------------|
|                                                              |                     | N          | OR   | 95% CI      | N          | OR   | 95% CI     | N          | OR   | 95% CI     | N          | OR   | 95% CI     |                 |                        |
| <b>Cases with advanced stage prostate cancer<sup>b</sup></b> |                     |            |      |             |            |      |            |            |      |            |            |      |            |                 |                        |
| Docosapentaenoic acid                                        | GG                  | 18/227     | 1.00 | Referent    | 8/191      | 0.47 | 0.20, 1.12 | 13/206     | 0.74 | 0.35, 1.57 | 13/196     | 0.75 | 0.36, 1.59 | 0.73            | 0.60                   |
|                                                              | GA/AA               | 12/118     | 1.24 | 0.57, 2.68  | 14/150     | 1.16 | 0.56, 2.42 | 7/137      | 0.60 | 0.24, 1.50 | 11/144     | 0.90 | 0.41, 1.97 | 0.20            |                        |
| EPA + DHA                                                    | GG                  | 10/230     | 1.00 | Referent    | 14/199     | 1.70 | 0.73, 3.93 | 16/200     | 1.87 | 0.82, 4.27 | 12/191     | 1.43 | 0.59, 3.46 | 0.49            | 0.28                   |
|                                                              | GA/AA               | 11/115     | 2.27 | 0.93, 5.54  | 13/144     | 2.15 | 0.91, 5.08 | 9/143      | 1.48 | 0.58, 3.77 | 11/147     | 1.82 | 0.73, 4.54 | 0.65            |                        |
| Total n-3 PUFAs                                              | GG                  | 11/229     | 1.00 | Referent    | 16/202     | 1.67 | 0.75, 3.71 | 12/201     | 1.29 | 0.55, 3.03 | 13/188     | 1.38 | 0.59, 3.23 | 0.71            | 0.23                   |
|                                                              | GA/AA               | 13/118     | 2.38 | 1.02, 5.51  | 12/138     | 1.82 | 0.77, 4.28 | 8/142      | 1.19 | 0.46, 3.07 | 11/151     | 1.57 | 0.64, 3.84 | 0.35            |                        |
| Arachidonic acid                                             | GG                  | 15/207     | 1.00 | Referent    | 14/220     | 0.91 | 0.43, 1.95 | 14/204     | 1.00 | 0.47, 2.15 | 9/189      | 0.68 | 0.29, 1.60 | 0.46            | 0.81                   |
|                                                              | GA/AA               | 13/134     | 1.34 | 0.62, 2.94  | 8/124      | 0.89 | 0.36, 2.19 | 14/139     | 1.39 | 0.65, 3.01 | 9/152      | 0.99 | 0.41, 2.38 | 0.78            |                        |
| <b>Cases with high-grade prostate cancer<sup>c</sup></b>     |                     |            |      |             |            |      |            |            |      |            |            |      |            |                 |                        |
| Docosapentaenoic acid                                        | GG                  | 8/227      | 1.00 | Referent    | 9/191      | 1.41 | 0.53, 3.76 | 6/206      | 0.82 | 0.28, 2.43 | 8/196      | 1.24 | 0.45, 3.42 | 0.96            | 0.07                   |
|                                                              | GA/AA               | 10/118     | 2.46 | 0.93, 6.50  | 7/150      | 1.40 | 0.49, 3.98 | 4/137      | 0.89 | 0.26, 3.06 | 3/144      | 0.62 | 0.16, 2.42 | 0.030           |                        |
| EPA + DHA                                                    | GG                  | 5/230      | 1.00 | Referent    | 7/199      | 1.53 | 0.47, 4.96 | 8/200      | 1.67 | 0.53, 5.26 | 11/191     | 2.34 | 0.77, 7.08 | 0.15            | 0.005                  |
|                                                              | GA/AA               | 9/115      | 3.72 | 1.20, 11.54 | 7/144      | 2.11 | 0.65, 6.86 | 6/143      | 1.85 | 0.55, 6.28 | 2/147      | 0.57 | 0.11, 3.06 | 0.026           |                        |
| Total n-3 PUFAs                                              | GG                  | 5/229      | 1.00 | Referent    | 7/202      | 1.57 | 0.48, 5.08 | 8/201      | 1.70 | 0.54, 5.37 | 11/188     | 2.39 | 0.79, 7.25 | 0.13            | 0.002                  |
|                                                              | GA/AA               | 9/118      | 3.60 | 1.16, 11.15 | 9/138      | 2.92 | 0.95, 8.99 | 4/142      | 1.26 | 0.33, 4.82 | 2/151      | 0.56 | 0.10, 3.04 | 0.011           |                        |
| Arachidonic acid                                             | GG                  | 7/207      | 1.00 | Referent    | 10/220     | 1.50 | 0.55, 4.06 | 6/204      | 0.93 | 0.30, 2.83 | 8/189      | 1.31 | 0.45, 3.82 | 0.76            | 0.031                  |
|                                                              | GA/AA               | 12/134     | 2.76 | 1.05, 7.29  | 3/124      | 0.72 | 0.18, 2.89 | 9/139      | 2.21 | 0.79, 6.19 | 0/152      | –    | –          | 0.017           |                        |
| <b>Cases with lethal prostate cancer<sup>d</sup></b>         |                     |            |      |             |            |      |            |            |      |            |            |      |            |                 |                        |
| Docosapentaenoic acid                                        | GG                  | 7/227      | 1.00 | Referent    | 6/191      | 0.90 | 0.29, 2.76 | 6/206      | 0.83 | 0.27, 2.53 | 7/196      | 1.04 | 0.35, 3.08 | 0.74            | 0.69                   |
|                                                              | GA/AA               | 6/118      | 1.49 | 0.48, 4.61  | 5/150      | 0.96 | 0.30, 3.13 | 6/137      | 1.27 | 0.41, 3.89 | 4/144      | 0.75 | 0.21, 2.65 | 0.20            |                        |
| EPA + DHA                                                    | GG                  | 6/230      | 1.00 | Referent    | 4/199      | 0.74 | 0.21, 2.70 | 9/200      | 1.52 | 0.52, 4.45 | 7/191      | 1.11 | 0.35, 3.52 | 0.49            | 0.60                   |
|                                                              | GA/AA               | 5/115      | 1.57 | 0.46, 5.32  | 5/144      | 1.28 | 0.38, 4.32 | 3/143      | 0.70 | 0.17, 2.90 | 8/147      | 1.63 | 0.52, 5.07 | 0.65            |                        |

|                  |       |       |      |            |       |      |            |       |      |            |       |      |            |      |      |
|------------------|-------|-------|------|------------|-------|------|------------|-------|------|------------|-------|------|------------|------|------|
| Total n-3 PUFAs  | GG    | 6/229 | 1.00 | Referent   | 5/202 | 0.87 | 0.26, 2.92 | 9/201 | 1.53 | 0.52, 4.47 | 6/188 | 0.93 | 0.28, 3.07 | 0.71 | 0.72 |
|                  | GA/AA | 5/118 | 1.50 | 0.44, 5.08 | 6/138 | 1.58 | 0.49, 5.05 | 2/142 | 0.47 | 0.09, 2.39 | 8/151 | 1.51 | 0.48, 4.73 | 0.35 |      |
| Arachidonic acid | GG    | 8/207 | 1.00 | Referent   | 7/220 | 0.83 | 0.29, 2.34 | 6/204 | 0.77 | 0.26, 2.28 | 5/189 | 0.53 | 0.16, 1.72 | 0.46 | 0.68 |
|                  | GA/AA | 7/134 | 1.32 | 0.46, 3.77 | 5/124 | 0.92 | 0.29, 2.92 | 6/139 | 1.01 | 0.34, 3.04 | 3/152 | 0.42 | 0.10, 1.70 | 0.78 |      |

Abbreviations: BMI, body mass index; CARET, Carotene and Retinol Efficacy Trial; CI: confidence interval; DHA, docosahexaenoic acid; DPA, docosapentaenoic acid; EPA, eicosapentaenoic acid; *MPO*, myeloperoxidase gene; N: number of cases/number of controls; OR: odds ratio; PUFAs, polyunsaturated fatty acids.

<sup>a</sup> Multivariate adjusting age at enrollment (continuous), race (white, black, others), CARET randomization assignment (retinol plus  $\beta$ -carotene, placebo), family history of prostate cancer in first-relatives (yes, no), alcohol consumption (non-drinker, below median, at or above median, unknown), smoking status (current, former/never), smoking pack-year (<40, 40, <60,  $\geq$ 60), and BMI (continuous).

<sup>b</sup> 96 cases and 1369 controls. Cases had either clinical or pathological stage III/IV prostate tumor at diagnosis.

<sup>c</sup> 55 cases and 1369 controls. Cases had prostate tumor with Gleason score  $\geq$ 8.

<sup>d</sup> 47 cases and 1369 controls. Cases had either metastatic (clinical or pathological stage IV) prostate tumor at diagnosis or prostate cancer-specific death during follow-up through 2005.
